# Supplementary material
Source: publisher figshare collection journal article supplement (https://acs.figshare.com/ndownloader/files/5738409)
Supplement: Supplementary file 1 [file 5738409]

# TEMPERATURE DEPENDENCE OF ANISOTROPIC PROTEIN BACKBONE

## DYNAMICS

Tianzhi Wang, Sheng Cai and Erik R.P. Zuiderweg

### Supplementary Material.

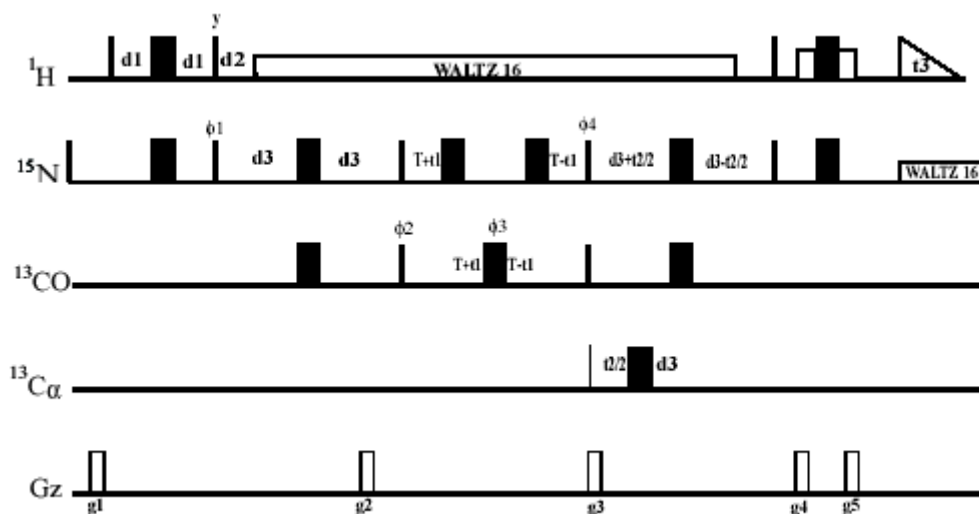

#### S1

Pulse sequence for the determination of  $^{13}\text{CO}$  CSA /  $^{13}\text{CO}$ - $^{13}\text{C}_\alpha$  DD cross-correlation rate. Narrow and wide bars denote  $90^\circ$  and  $180^\circ$  hard pulses, respectively. Pulse phases are along the x-axis unless indicated otherwise.  $90^\circ$  and  $180^\circ$  square soft pulses with duration 65 and 130  $\mu\text{s}$  are used for both  $^{13}\text{CO}$  and  $^{13}\text{C}_\alpha$ . The half-sine-shaped field gradient pulses of 1ms duration have strengths at the center  $g_1=30\text{G/cm}$ ,  $g_2=18\text{G/cm}$ ,  $g_3=18\text{G/cm}$ ,  $g_4=24\text{G/cm}$  and  $g_5=24\text{G/cm}$ . Constant time periods  $4T$  and  $2*d_3$  are used as  $^{13}\text{CO}$  and  $^{15}\text{N}$  chemical shift evolution periods, respectively. Delays (in milliseconds) are as follows:  $d_1=2.5$ ,  $d_2=5.55$ ,  $d_3=14$  and  $T=9$ . Phase cycling is:  $\phi_1=x, -x$ ;  $\phi_2=x, x, -x, -x$ ;  $\phi_3=4(x), 4(-x), 4(y), 4(-y)$ ;  $\phi_4=4(x)$ ; receiver= $x, 2(-x), 2(x), 2(-x), x, -x, 2(x), 2(-x), 2(x), -x$ . Phase  $\phi_2$  and  $\phi_4$  are incremented for States-TPPI quadrature detection. The 3D data are recorded with  $36*50*1024$  complex points ( $t_1*t_2*t_3$ ).

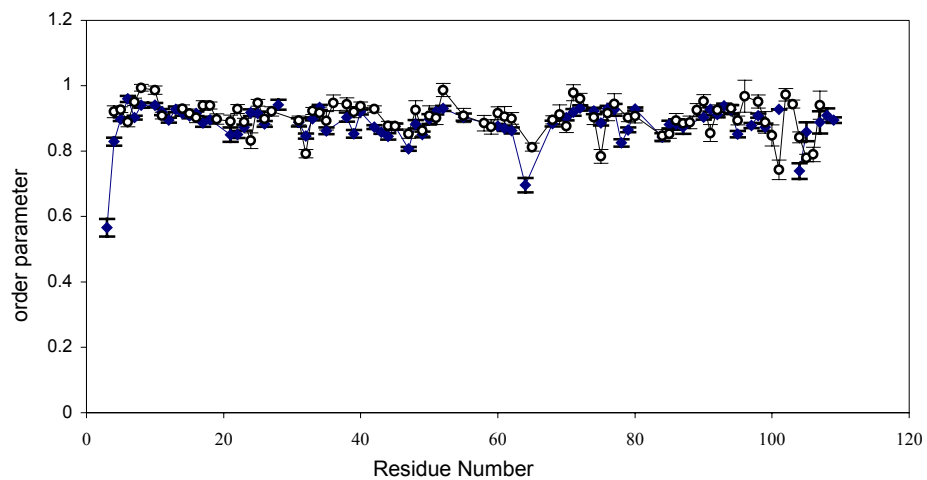

## S2

The  $^{15}\text{N}$  order parameters for  $^{15}\text{N}/^{13}\text{C}$  labeled Binase (12.3 kDa), pH 7.0 in 90%  $\text{H}_2\text{O}/10\text{ D}_2\text{O}$ , at 278 and 303 K are presented with open circles and diamonds respectively. The data was obtained with a Bruker Avance 500 MHz spectrometer.

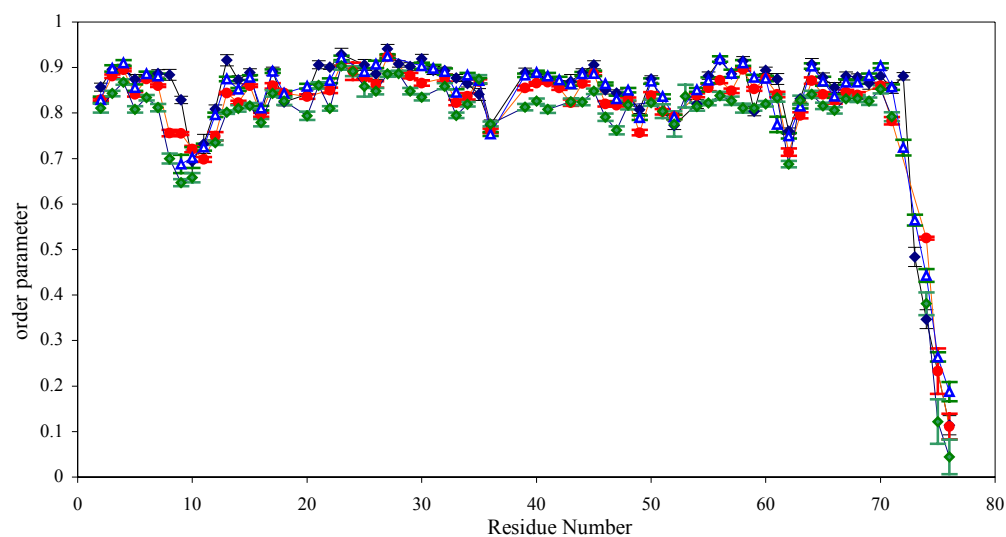

### S 3

The  $^{15}\text{N}$  order parameters for 1 mM  $^{15}\text{N}/^{13}\text{C}$  labeled Ubiquitin in 90%  $\text{H}_2\text{O}/10\text{ D}_2\text{O}$ , deuterated acetic acid buffer, pH 4.7, at 278, 293, 303 and 318 K are presented with black, blue, red and green color, respectively.

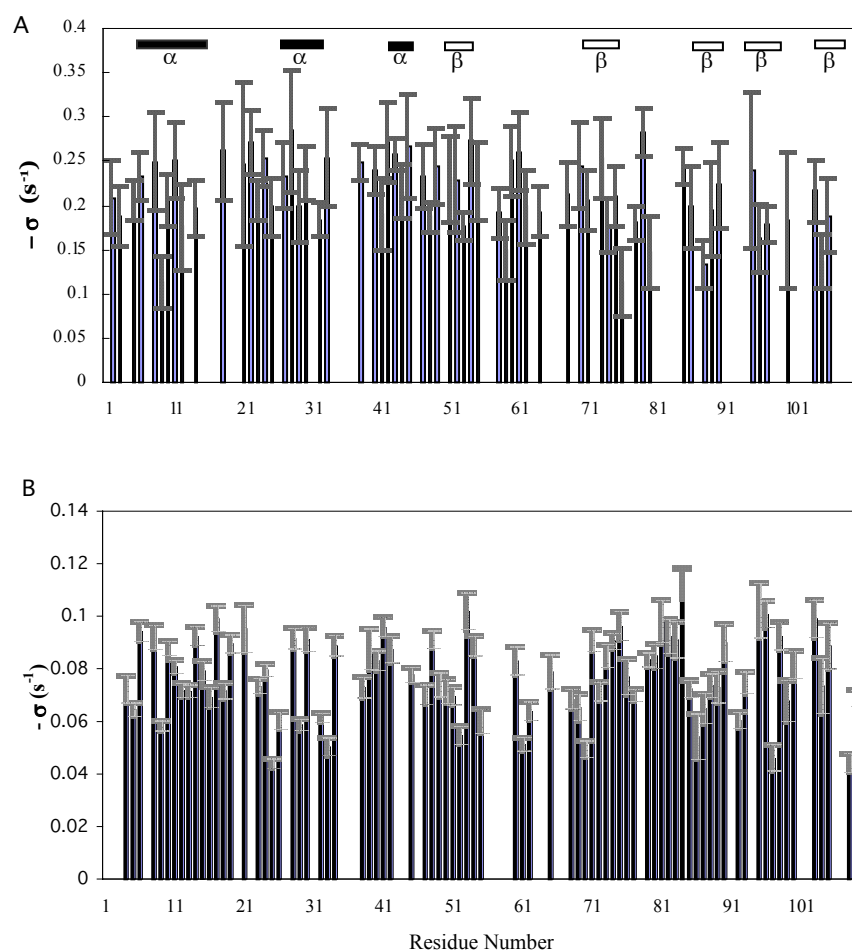

#### S4

The  $^{13}\text{CO}$ - $^{13}\text{C}_\alpha$  cross relaxation rates for Binase at 278 and 303 K are shown in panel A and B, respectively. The approximate locations of secondary structure elements are indicated above. The data was recorded using a 500 MHz spectrometer.
